# Supplementary material
Source: PubMed Central journal article supplement (PMC3079004)
Supplement: NIHMS274726-supplement-02.pdf [file NIHMS274726-supplement-02.pdf]

## PCR analysis

| gene           | forward primer sequence 5'-3'     | reverse primer sequence 5'-3'     | amplicon size | gene bank accession number |
|----------------|-----------------------------------|-----------------------------------|---------------|----------------------------|
| mu p62         | CAT CAA ACA GCT GGC GAG AT        | GTG CCC GAT AAT TCT GAC GA        | 342 bp        | AF057352                   |
| LT2            | CTT AAT GAG GTC GGA ATC GA        | GCT TGT CGT AAT AAT GGC GGC ATA C | 500 bp        | DL242837                   |
| D7 Mit140      | GGA AGT TGT GGG ACC TTT AGG       | CCT CTT CTG GCC TGT GAG GG        | 137 bp/125 bp | AC133502                   |
| D7 Mit12       | GCT GGG TTT ATT CAT TGA AA        | TCC AGC TCA TGG GTA GAA GA        | 197 bp/220 bp | AC122001                   |
| SnuPE IGF2     | TCA GTG AAT CAA ATT A             |                                   |               | NM_010514.2                |
| SnuPE H19      | CTC AGA CGG AGA TGG A             |                                   |               | NR_001592                  |
| hu-H19         | TTC AAA GCC TCC ACG ACT CT        | CTG AGA CTC AAG GCC GTC TC        | 100 bp        | NR_002196                  |
| hu-β-actin     | TGC GTG ACA TTA AGG AGA AG        | GTC AGG CAG CTC GTA GCT CT        | 106 bp        | NM_001101                  |
| hu-IGF2        | GGA CTT GA TCC CTG AAC CA         | TGA AAA TTC CCG TGA GAA GG        | 100 bp        | NM_000612                  |
| mu-β-actin     | GCT GTG CTA TGT TGC TCT AGA CTT C | CTC AGT AAC AGT CCG CCT AGA AGC   | 500 bp        | NM_007393                  |
| mu-H19 cDNA    | TAA GTC GAT TGC ACT GGT TTG GAG T | TGA TGG AAC TGC TTC CAH ACT AG    | 188 bp        | NR_001592                  |
| mu-Igf2 cDNA   | GGC CCC GGA GAG ACT CTG TGC       | TGG GGG TGG GTA AGG AGA AAC CT    | 600 bp        | NM_010514                  |
| hu p62         | GTT CCC GCA TCA TCA CTC TTA T     | GAA TCT CGC CAG CTG TTT GA        | 117 bp        | AF057352                   |
| mu Igf2        | GGA AGT CGA TGT TGG TGC TTC TC    | CGA ACA GAC AAA CTG AAG CGT GT    | 186 bp        | NM_010514                  |
| mu H19         | CAG AGG TGG ATG TGC CTG CC        | CAG AGG TGG ATG TGC CTG CC        | 80 bp         | NM_023123                  |
| mu 18S         | GCG CTT CTC TTT CCG CCA           | AGC TCT CCG ACA CCT CTC TT        | 149 bp        | NM_003278                  |
| mu cyclophilin | GGC CGA TGA CGA GCC C             | TGT CTT TGG AAC TTT GTC TGC       | 63 bp         | NM_0089707                 |
| mu PTEN        | GTG AGG ATG GTA GGG GAA TC        | AGA GGA CTC AAA GGG GTG ACC       | 133 bp        | NM_008960                  |
| <u>mu Aire</u> | <u>CGG AGC TAC CTG CAG AGA C</u>  | <u>GTG ACA GCA GCA TCA GAG C</u>  | <u>106 bp</u> | <u>NM_009646</u>           |
| <u>tTA</u>     | <u>GTG CAG AGC CAG CCT TCT TA</u> | <u>CCT CGA TGG TAG ACC CGT AA</u> | <u>129 bp</u> | <u>U89929</u>              |

### Taq-Man probe sequences

| probe name  | sequence 5' - 3'                                     | Taq Man probe | annealing temperature |
|-------------|------------------------------------------------------|---------------|-----------------------|
| hu-p62      | 6-FAM d(TGT GAA TCT CTT CAT CCC AAC CCA GGC T) BHQ-1 | 1.5 pmol      | 60°C                  |
| Igf2        | 6-FAM d(CCT TCG CCT TGT GCT GCA TCG CTG CT) BHQ-1    | 1.5 pmol      | 60°C                  |
| H19         | 6-FAM d(TCA CTG AAG GCG AGG ATG ACA GGT GTG G) BHQ-1 | 2.5 pmol      | 60°C                  |
| 18S         | 6-FAM d(CCA CGC CAA CCC ACC GCC CTG TG) BHQ-1        | 2.5 pmol      | 60°C                  |
| cyclophilin | 6-FAM d(TGG GCC GCG TCT CCT TCG A) BHQ-1             | 1.5 pmol      | 60°C                  |

### PCR conditions

| gene         | initial denaturation<br>(94°C) | denaturation<br>(94°C) | annealing<br>(60°C) | elongation<br>(72°C) |
|--------------|--------------------------------|------------------------|---------------------|----------------------|
| PTEN         | 10 min                         | 15 sec                 | 15 sec              | 15 sec               |
| mu 18S       | 8 min                          | 15 sec                 | 15 sec              | 15 sec               |
| Igf2 (SNuPE) | 5 min                          | 30 sec                 | 60 sec              | 60 sec               |
| H19 (SNuPE)  | 5 min                          | 60 sec                 | 60 sec              | 30 sec               |

### mRNA stability

Experiments were performed the day after cell isolation. Therefore, medium was replaced by FCS-free William's medium E (Gibco, Invitrogen, Karlsruhe, Germany) two hours before the experiments started and cells were maintained under serum-free conditions for up to 10 hours until harvest.

For transcription block in murine hepatocytes, 1.0 mg/ml Act D was diluted in cell culture medium to a final concentration of 10 µg/ml. All cells were treated at different time points, but harvested simultaneously (0/4/6/8/10 hours) after Act D incubation. Therefore, the cell culture medium was removed, cells were washed twice with 1x PBS and Qiazol lysis reagent was added to each well.
