# Supplementary material
Source: PubMed Central journal article supplement (PMC3079004)

**A**

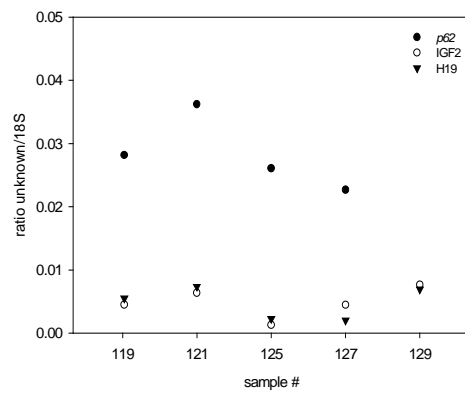

**B**

**p62L23**

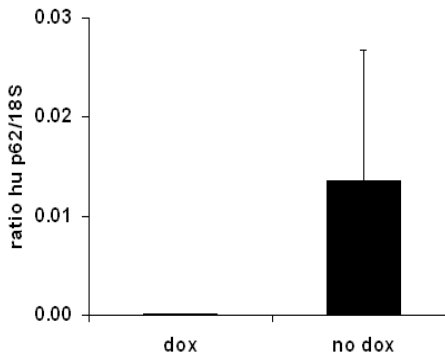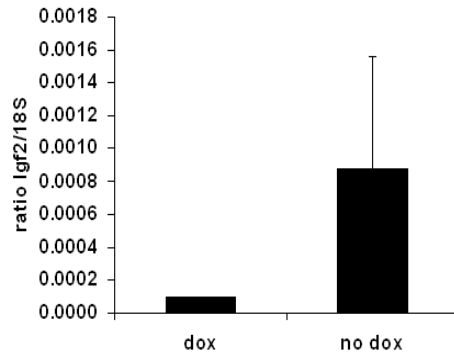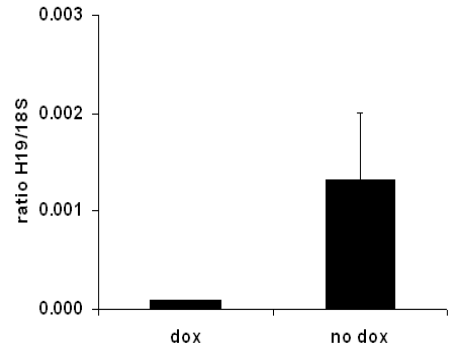

Supplement: NIHMS274726-supplement-01.pdf [file NIHMS274726-supplement-01.pdf]
